# Supplementary material for: Investigating Relationships Between Nitrogen Inputs and In-Stream Nitrogen Concentrations and Exports Across Catchments in Victoria, Australia
Source: Copernicus journal article supplement (doi:10.5194/egusphere-2025-2456), 2025-07-07
Supplement: Supplementary file 2 [file Table_S1_Catchment_Information_and_Nitrogen_Input_Data.xlsx]

## Sheet: Sheet1
Sites	Sites name	Latitude	Longitude	Catchment Area (km²)	Land Use ( % of Catchment Area)									Catchment Characteristics						Total Nitrogen Inputs and Outputs
					Forests (%)	Water (%)	Intensive Uses (%)	Cropping (%)	Dairy (%)	Horticulture (%)	Mixed Farming and Grazing (%)	Non-Dairy (%)	Fertilised Addtive Land Use FAFU (%)	Area Normalized Streamflow (mm yr⁻¹)	Annual Temperature (°C)	Catchment Slope (°)	Mean Annual Rainfall (mm yr⁻¹)	Runoff pereniality (°)	Stream Density	Fertiser Nitrogen Input (kg ha⁻¹)	Total N Fixation (kg/ha)	Atmospheric Load (kg ha⁻¹)	Total Nitrogen Input (kg ha⁻¹)	TN Concentration (mg L⁻¹)	Nox:TN Ratio	Riverine Export (kg ha⁻¹)	Riverine Export (% of Inputs)
221201	CANN RIVER (WEST BRANCH) @ WEERAGUA	-37.373	149.199	315.586	96.7756	0	0.397946	0	0	0	0.0593088	2.76718	2.82649	159.695	10.69	18.6083	1049.46	15.43	0.802842	0.44558	5	5	10.4456	0.376182	0.3	1.10994	10.6259
221208	WINGAN RIVER @ WINGAN INLET NATIONAL PARK	-37.689	149.492	420.683	96.8775	0	0.681485	0	0	0	2.16358	0.27742	2.441	180.302	13.392	6.48679	1064.21	17.32	0.863543	0.41654	5	5	10.4165	0.421455	0.1	1.38259	13.273
221211	COMBIENBAR RIVER @ COMBIENBAR	-37.44	148.983	178.539	92.0626	0	1.80324	0	0	0	3.41516	2.71897	6.13413	212.939	11.199	18.8082	1098.22	14.38	0.916113	2.2873	5	5	12.2873	0.528818	0.5	1.91303	15.5691
221212	BEMM RIVER @ PRINCES HIGHWAY	-37.607	148.902	730.674	95.3692	0	1.44609	0	0	0	1.85802	1.32673	3.18475	284.072	11.477	12.0419	1162.27	14.26	0.907267	1.04873	5	5	11.0487	0.538727	0.5	2.48584	22.4989
222217	RODGER RIVER @ JACKSONS CROSSING	-37.41	148.36	433.309	100	0	0	0	0	0	0	0	0	196.954	11.038	4.33	997.005	12.85	0.773836	0	5	5	10	0.459455	0.4	2.0119	20.119
223202	TAMBO RIVER @ SWIFTS CREEK	-37.269	147.729	899.29	70.3219	0	2.32901	0	0	0.288896	3.92984	23.1304	27.3491	70.5625	9.966	14.5904	822.282	9.74	0.809919	4.0967	10	5	19.0967	0.298636	0.1	0.803401	4.20702
223204	NICHOLSON RIVER @ DEPTFORD	-37.593	147.697	288.922	99.5415	0	0.458477	0	0	0	0	0	0	130.689	11.454	1.77879	825.646	9.4	0.816912	0	5	5	10	0.397182	0.3	0.963234	9.63234
223214	TAMBO RIVER @ U/S OF SMITH CREEK	-36.955	147.928	31.6795	64.0258	0	1.25302	0	0	0	4.15392	30.5673	34.7212	57.8097	8.49	10.7422	1023.21	7.74	0.973721	5.76147	10	5	20.7615	0.394545	0.1	0.319297	1.53793
224203	MITCHELL RIVER @ GLENALADALE	-37.764	147.375	3922.95	94.5787	5.60803e-06	1.1062	0	0	0.00422208	3.55035	0.760519	4.31509	200.606	10.219	13.4252	1056.19	8.84	0.817352	0.786856	5	5	10.7869	0.229636	0.1	0.742224	6.88082
224206	WONNANGATTA RIVER @ CROOKED RIVER	-37.408	147.089	1103.76	99.3073	0	0.108056	0	0	0	0.584646	0	0.584646	280.233	9.449	5.67	1233.3	8.44	0.854983	0.0935028	5	5	10.0935	0.133273	0.1	0.648897	6.42886
224213	DARGO RIVER @ LOWER DARGO ROAD	-37.495	147.269	667.862	88.7334	0	3.0175	0	0	0	8.06931	0.179808	8.24912	269.708	9.47	7.82114	1095.89	9.63	0.769249	1.62849	5	5	11.6285	0.211727	0.2	1.00475	8.64044
225201	AVON RIVER @ STRATFORD	-37.969	147.076	1470.12	79.6036	0.00180869	4.63382	0	1.75019	0.0113548	13.7927	0.206527	15.7608	109.622	11.911	13.3845	811.371	8.76	0.792555	4.97051	17	5	26.9705	0.386273	0.3	1.17695	4.36382
226226	TANJIL RIVER @ TANJIL JUNCTION	-37.98	146.193	297.505	90.1059	0	3.25336	0	0.152576	0.0911683	2.38329	4.01369	6.64073	432.487	10.298	16.1045	1388.54	9.14	0.92605	2.19272	5	5	12.1927	0.435	0.5	2.72332	22.3356
227200	TARRA RIVER @ YARRAM	-38.551	146.683	224.663	58.4928	0.0174217	8.4288	0	12.6366	0	20.4244	0	33.061	131.667	12.708	13.7265	964.358	6.89	0.749798	28.2538	29	5	62.2538	1.119	0.5	4.1891	6.72908
227211	AGNES RIVER @ TOORA	-38.64	146.373	66.0537	52.4614	0	8.91374	0	9.3444	0	26.279	3.00144	38.6249	375.607	12.319	6.28148	1189.95	5.07	0.78888	25.6637	17	5	47.6637	1.37327	0.4	7.3644	15.4507
233214	BARWON RIVER EAST BRANCH @ FORREST	-38.529	143.73	15.7758	97.5069	0	1.02442	0	0	0	1.46871	0	1.46871	396.949	11.55	10	1137.98	4.05	0.854332	0.262208	5	5	10.2622	0.333727	0.3	2.65799	25.9007
233218	BARWON RIVER @ INVERLEIGH	-38.149	143.99	1695.2	19.4897	1.46395	9.81421	5.35755	5.93843	0.456414	29.0389	28.4409	69.2322	40.5057	12.623	14.5787	799.551	2.37	0.692476	33.3854	22	5	60.3854	1.03445	0.1	0.854678	1.41537
233224	BARWON RIVER @ RICKETTS MARSH	-38.325	143.834	580.249	46.1977	0.101429	8.00264	0.580091	10.3318	1.04279	14.4728	19.2707	45.6982	94.103	12.15	8.42742	944.274	2.73	0.884921	27.4753	34	5	66.4753	0.838818	0.1	1.46749	2.20758
234203	PIRRON YALLOCK CREEK @ PIRRON YALLOCK (ABOVE H'WY BR.)	-38.354	143.419	169.399	12.2735	0.00641681	8.87716	0	40.6988	0	17.0715	21.0727	78.8429	89.1177	12.533	9.75361	824.973	0.39	0.419261	80.8153	34	5	119.815	2.41273	0.1	3.19309	2.66501
235203	CURDIES RIVER @ CURDIE	-38.445	142.96	790.328	9.04478	0.0372491	6.13645	0	52.605	0.0005542	31.8662	0.309779	84.7815	126.861	12.716	3.33214	883.715	0.33	0.717684	106.305	29	5	140.305	1.75736	0.2	5.10016	3.63506
235211	KENNEDYS CREEK @ KENNEDYS CREEK	-38.589	143.256	268.31	40.5438	0	3.72527	0	32.554	0	16.2177	6.9593	55.7309	154.666	12.525	9.47759	954.033	0.58	0.854262	69.6608	29	5	103.661	1.73455	0.3	4.4505	4.29333
235224	GELLIBRAND RIVER @ BURRUPA	-38.702	143.248	1043.77	63.7172	0.00352761	4.85752	0	14.5518	0.126687	10.9447	5.79854	31.4218	233.991	12.246	6.88303	1090.16	2.37	0.852877	35.022	29	5	69.022	0.902636	0.3	3.3647	4.87483
235227	GELLIBRAND RIVER @ BUNKERS HILL	-38.524	143.483	314.074	73.2209	0	7.45206	0	6.34475	0.272993	5.8396	6.86966	19.327	296.217	11.839	6.25289	1159.56	3.52	0.810145	20.0139	5	5	30.0139	0.61	0.4	2.98883	9.95817
235234	LOVE CREEK @ GELLIBRAND	-38.483	143.572	75.4579	67.8203	0	7.73782	0	10.4308	0	6.35347	7.65756	24.4419	93.5172	12.144	8.01863	999.927	1.17	0.796147	25.1015	17	5	47.1015	0.937727	0.2	1.43399	3.04447
235237	SCOTTS CREEK @ CURDIE (DIGNEYS BRIDGE)	-38.448	142.989	346.12	11.1152	0	4.6662	0	58.2184	0	25.5099	0.490301	84.2186	183.704	12.729	9.75148	937.77	0.34	0.804847	120.074	29	5	154.074	2.39182	0.2	8.74978	5.67894
237200	MOYNE RIVER @ TOOLONG	-38.32	142.226	592.086	0.681799	0	2.96255	0	10.6856	0	85.67	0	96.3557	73.3415	12.947	12.8761	737.356	0.06	0.581722	33.6242	29	5	67.6242	1.13173	0.1	2.01145	2.97445
237207	SURRY RIVER @ HEATHMERE	-38.243	141.663	294.341	54.7955	0	6.76968	0	3.87446	0	19.9178	14.6426	38.4348	102.389	13.022	4.12797	829.821	0.28	0.318765	12.2432	22	5	39.2432	0.458182	0.1	1.24515	3.17292
238202	GLENELG RIVER @ SANDFORD	-37.619	141.429	9140.97	30.1602	1.04378	4.42243	0.573656	0.324158	0.0110943	60.3234	3.14125	64.3736	29.0073	12.838	2.4588	674.724	0.2	0.640598	12.7305	17	5	34.7305	1.23055	0.1	0.712045	2.0502
238206	GLENELG RIVER @ DARTMOOR	-37.925	141.281	11230.3	35.2856	0.849919	4.28264	0.466932	0.422864	0.0114963	54.2402	4.4404	59.5819	31.3637	12.885	4.93458	687.249	0.16	0.59	11.8068	17	5	33.8068	1.47273	0.4	0.725795	2.14689
238223	WANDO RIVER @ WANDO VALE	-37.496	141.426	177.256	22.3498	0	3.07254	0	0	0	68.9636	5.614	74.5776	64.3167	12.619	3.7811	692.33	0.02	0.7664	11.4275	17	5	33.4275	1.13809	0.1	1.52994	4.5769
238228	WANNON RIVER @ HENTY	-37.645	141.506	4083.66	19.2121	0.0337406	5.24423	0.18263	0.200442	0.0248339	73.6192	1.4828	75.51	34.059	12.67	2.27818	687.2	0.22	0.603905	16.0738	17	5	38.0738	1.34964	0.1	0.870511	2.28638
238231	GLENELG RIVER @ BIG CORD	-37.312	142.367	58.577	99.7557	0	0	0	0	0	0.244311	0	0.244311	126.908	11.855	12.5438	815.856	0.9	0.646592	0.0235052	5	5	10.0235	0.307636	0	0.420431	4.19445
401203	MITTA MITTA RIVER @ HINNOMUNJIE	-36.946	147.606	1527.54	70.547	0.000684762	4.04802	0	0	0.411367	2.98753	22.0054	25.4043	283.831	8.647	12.9604	1180.38	10.28	0.807398	5.04765	10	5	20.0476	0.185455	0.1	0.606881	3.02719
401204	MITTA MITTA RIVER @ TALLANDOON	-36.408	147.231	4749.65	80.0057	0.0717872	2.5472	0	0.621237	0.1323	1.64513	14.9766	17.3753	226.183	9.814	5.76627	1198.38	7.5	0.769436	4.58469	10	5	19.5847	0.270636	0.3	0.57021	2.91151
401211	MITTA MITTA RIVER @ COLEMANS	-36.531	147.457	3664.09	78.3439	0.0929529	2.57139	0	0	0.171496	1.95976	16.8605	18.9918	211.656	9.367	10.414	1167.46	8.46	0.771802	3.50086	10	5	18.5009	0.217	0.2	0.446313	2.41239
401212	NARIEL CREEK @ UPPER NARIEL	-36.445	147.829	255.531	99.6662	0	0.33385	0	0	0	0	0	0	537.858	8.912	3.35423	1384.02	7.68	0.820704	0	5	5	10	0.140727	0.2	0.76653	7.6653
401215	MORASS CREEK @ UPLANDS	-36.866	147.703	537.236	49.9584	0	3.46349	0	0	0	3.82979	42.7483	46.5781	57.6439	9.376	2.0983	976.472	8.04	0.750149	7.0897	10	5	22.0897	0.847273	0	0.585603	2.65102
401216	BIG RIVER @ JOKERS CREEK	-36.933	147.472	357.478	94.3268	0	1.68027	0	0	0	0.065453	3.9275	3.99295	634.048	7.953	9.33654	1603.01	10.91	0.846205	0.796282	5	5	10.7963	0.124364	0.1	0.958295	8.87616
401226	VICTORIA RIVER @ VICTORIA FALLS	-37.088	147.458	177.863	69.241	0	3.2389	0	0	0.024339	1.80544	25.6903	27.5201	132.302	7.975	10.2282	1191.31	9.89	0.82039	5.4155	10	5	20.4155	0.324	0.1	0.595252	2.91569
402203	KIEWA RIVER @ MONGANS BRIDGE	-36.595	147.1	556.576	80.2082	0.0932865	6.67671	0.315975	2.02649	0.298353	4.15253	6.2285	13.0218	859.956	9.3	2.57019	1686.03	9.91	0.922246	10.1441	5	5	20.1441	0.232727	0.3	2.43658	12.0958
402205	KIEWA RIVER @ BANDIANA	-36.138	146.954	1668.23	55.6801	0.0316856	9.69732	0.11819	7.24673	0.175713	6.40017	20.6501	34.5909	335.371	11.55	0.743138	1267.97	6.5	0.888265	22.6242	10	5	37.6242	0.338909	0.2	1.52142	4.04372
402222	KIEWA RIVER @ KIEWA (MAIN STREAM)	-36.254	147.02	1151.83	64.7874	0.0450771	6.05978	0.171179	9.59446	0.185073	4.9991	14.1579	29.1077	470.796	10.914	9.02846	1414.6	7.57	0.87423	26.7626	10	5	41.7626	0.356818	0.2	2.15513	5.16041
402223	KIEWA RIVER WEST BRANCH @ U/S OF OFFTAKE	-36.791	147.16	100.727	97.0093	0	2.9907	0	0	0	0	0	0	1117.42	7.644	5.59751	1821.55	11.23	0.788669	0	5	5	10	0.114582	0.2	1.55355	15.5355
403205	OVENS RIVER @ BRIGHT	-36.726	146.953	493.572	91.8257	0	5.75377	0.0510482	0	0.518098	1.04911	0.802302	2.42056	407.953	10.491	7.77131	1494.02	6.53	0.809223	4.97177	5	5	14.9718	0.201727	0.3	1.07403	7.17372
403210	OVENS RIVER @ MYRTLEFORD	-36.571	146.718	1149.24	89.4616	0	5.39761	0.423123	0.158415	0.873706	1.89257	1.79301	5.14082	417.026	10.766	0.735611	1431.36	6.07	0.762681	7.67215	5	5	17.6721	0.238091	0.4	1.14071	6.45486
403213	FIFTEEN MILE CREEK @ GRETA SOUTH	-36.619	146.244	225.24	65.3288	0	4.20323	0	0	5.07298	20.5326	4.86235	30.4679	183.133	12.039	4.35422	1077	3.04	0.68074	22.9927	17	5	44.9927	0.378364	0.3	1.26609	2.81399
403217	ROSE RIVER @ MATONG NORTH	-36.821	146.582	180.408	77.3962	0	0.834526	0	0	0	21.7693	0	21.7693	289.374	11.239	7.87374	1327.39	4.24	0.839215	6.04787	17	5	28.0479	0.304	0.4	1.0528	3.75357
403223	KING RIVER @ DOCKER ROAD BRIDGE	-36.516	146.389	1080.57	65.8784	0	5.06084	0.111854	1.06828	4.4062	20.2324	3.24205	29.0608	273.845	11.639	2.78237	1207.03	4.58	0.872055	24.1095	17	5	46.1095	0.347818	0.3	1.416	3.07094
403230	OVENS RIVER @ ROCKY POINT	-36.533	146.668	2969.97	85.0225	0.0618962	4.00119	0.635459	0.471788	0.616612	3.9117	5.27888	10.9144	339.824	11.135	0.448998	1350.82	5.24	0.778697	8.3985	5	5	18.3985	0.306091	0.4	1.23042	6.68761
403241	OVENS RIVER @ PEECHELBA	-36.163	146.236	6265.17	60.5747	0.0354942	7.56246	0.378488	0.904939	1.82615	21.8685	6.84929	31.8273	230.943	12.149	7.31149	1128	4.47	0.795678	15.6873	17	5	37.6873	0.375455	0.3	1.22746	3.25694
403244	OVENS RIVER @ HARRIETVILLE	-36.884	147.062	121.496	95.5178	0	4.48222	0	0	0	0	0	0	635.246	9.223	0.837658	1541.43	8.35	0.820863	0	5	5	10	0.1091	0.3	0.758153	7.58153
404207	HOLLAND CREEK @ KELFEERA	-36.611	146.059	457.622	52.3908	0.00242558	7.95737	0	1.33324	0.0250534	36.8644	1.42669	39.6494	123.814	12.402	9.72725	974.046	2.76	0.708697	12.4867	17	5	34.4867	0.710182	0.2	1.50445	4.36241
405203	GOULBURN RIVER @ EILDON	-37.247	145.889	3950.22	70.1668	2.09393	7.12837	0.0841532	0	0.0652601	20.2606	0.200855	20.6109	294.223	10.769	9.57507	1210.42	5.02	0.885746	5.98156	17	5	27.9816	0.265455	0.4	0.793714	2.83656
405205	MURRINDINDI RIVER @ MURRINDINDI ABOVE COLWELLS	-37.414	145.564	107.258	99.982	0	0.0179661	0	0	0	0	0	0	399.949	10.573	11.3108	1514.13	7.01	0.843288	0	5	5	10	0.457273	0.4	2.04584	20.4584
405209	ACHERON RIVER @ TAGGERTY	-37.318	145.713	627.762	81.1745	0	5.41965	0	0	0.929715	12.3986	0.0775628	13.4059	426.043	10.855	1.84274	1446.24	5.98	1.02763	6.47777	17	5	28.4778	0.374545	0.4	1.87532	6.58522
405219	GOULBURN RIVER @ DOHERTYS	-37.331	146.131	701.903	99.4496	0	0.546778	0	0	0	0.00359879	0	0.00359879	455.542	9.753	5.38373	1416.83	6.01	0.876022	0.000662968	5	5	10.0007	0.151091	0.3	0.916786	9.16725
405251	BRANKEET CREEK @ ANCONA	-36.969	145.785	117.917	48.2833	0	5.78408	0	0	0.328833	44.2919	1.31189	45.9327	78.9539	11.74	0.920372	961.536	2.82	0.691656	9.6443	17	5	31.6443	0.761273	0.3	0.902731	2.85274
405264	BIG RIVER @ D/S OF FRENCHMAN CREEK JUNCTION	-37.519	146.076	332.037	99.1443	0	0.480787	0	0	0	0.374908	0	0.374908	505.28	9.421	9.08214	1591.85	6.59	0.849344	0.0842305	5	5	10.0842	0.295455	0.4	1.83599	18.2066
415207	WIMMERA RIVER @ EVERSLEY	-37.185	143.185	306.671	45.0566	0.0104379	7.17104	0.3966	0	2.13397	44.4563	0.775084	47.7619	24.6977	12.04	6.17932	712.535	0.65	0.684542	14.6947	17	5	36.6947	1.12618	0	0.499794	1.36203
